# Supplementary material for: The Effect of Prenatal Yoga on Pregnancy-Related Symptoms: A Pilot Quasi-Experimental Study
Source: PubMed Central journal article supplement — Complement Med Res. 2022 Dec 26;30(3):195–203. doi: 10.1159/000528801 (PMC10711776; doi:10.1159/000528801), 2022-12-26
Supplement: cmr-0030-0195-s02.pdf [file cmr-0030-0195-s02.pdf]

# Supplement 1: Prenatal Yoga Program

## MEDITATION

5 minutes

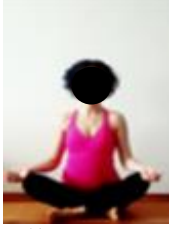

*Sukhasana (Easy Pose)*

## ASANAS

40 minutes

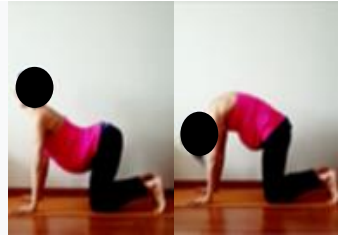

*Marjaryasana - Bitilasana*

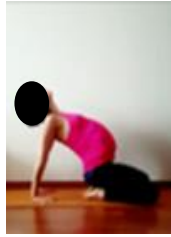

*Viranasana Version*

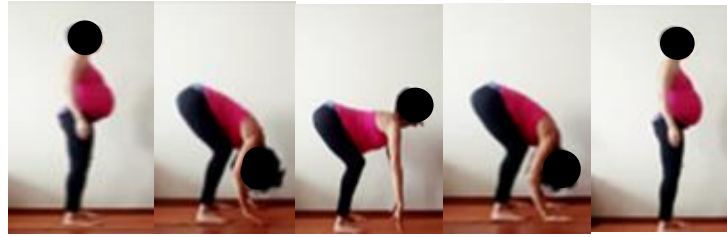

*Surya Namaskar (Sun Salutations)*

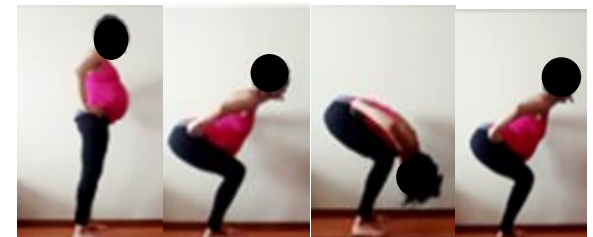

*Squat Flow*

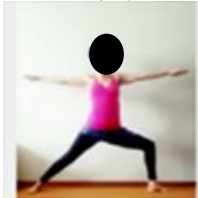

*Virabhadrasana -2*

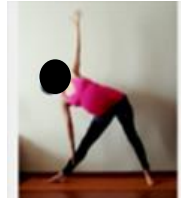

*Utthita Trikonasana*

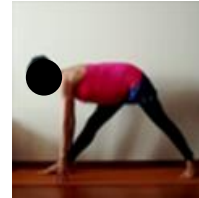

*Parsvottanasana*

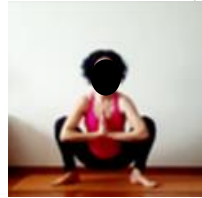

*Malasana*

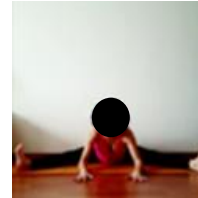

*Upavista Konasana*

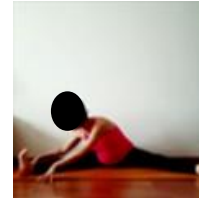

*Parivritta Upavista Konasana*

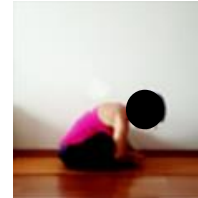

*Baddha Konasana*

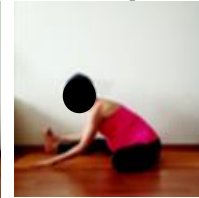

*Janu Sirsasana*

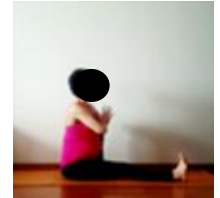

*Marichyasana Version*

## PRANAYAMA

5 minutes

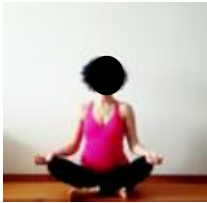

*Ujjayi Pranayama*

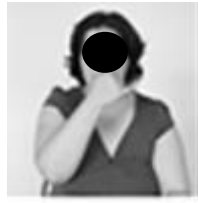

*Nadi Shodana Pranayama*

## SAVASANA

10 minutes

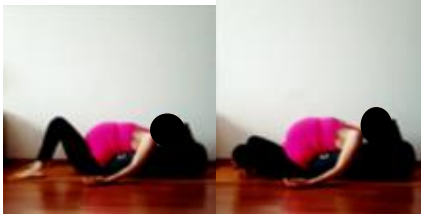

*Savasana Versions (Restorative Pose)*
